# Supplementary material
Source: PubMed Central journal article supplement (PMC2878877)
Supplement: NIHMS177577-supplement-01.pdf [file NIHMS177577-supplement-01.pdf]

## Expanding the Range of ‘Druggable’ Targets with Natural Product-based Libraries: An Academic Perspective

Renato A. Bauer,<sup>1</sup> Jacqueline M. Wurst,<sup>1</sup> and Derek S. Tan<sup>1,2,\*</sup>

<sup>1</sup>Tri-Institutional Training Program in Chemical Biology,

<sup>2</sup>Molecular Pharmacology & Chemistry Program and Tri-Institutional Research Program, Memorial Sloan–Kettering Cancer Center, 1275 York Ave, Box 422, New York, NY 10065, USA

### Supplementary Information

|                                                      |            |
|------------------------------------------------------|------------|
| A. Principal component analysis protocol and results | S1         |
| B. PubChem substructure search protocol and results  | S6         |
| C. Supplementary references                          | S7         |
| D. Principal component analysis complete dataset     | Excel file |

---

#### **A. Principal component analysis protocol and results**

A total of 127 compounds (**Table S1**) were selected for analysis, comprising the top 40 brand-name small molecule drugs by revenue in 2006 [1], 60 natural products with diverse structures, biosynthetic origins and biological activities, including the 24 identified by Ganesan as having led directly to an approved drug since 1970 [2], 10 drug-like pyrazolecarboxamides in the MLSMR from ChemBridge, 10 drug-like dihydrotriazolopyrimidines in the MLSMR from Chem Div, and the 7 natural products and library-derived probes discussed in the manuscript. This relatively small dataset allows for identification of individual compounds in the resulting chemical space plot while retaining robustness – removal of pladienolide from the dataset resulted in a rmsd change of 0.04% on the PC1 axis and 0.33% on the PC2 axis for the positions of the remaining 126 compounds. Notably, analyses with an additional 10 different scaffolds each from the ChemBridge and Chem Div drug-like libraries gave similar results (not shown).

A set of 20 physicochemical properties (**Table S2**) for all 127 compounds were then obtained from PubChem and/or calculated using free online cheminformatics tools (Molinspiration [3], VCCLab [4,5]), ChemDraw, and manual inspection: molecular weight (MW) [6], nitrogens (N), oxygens (O), calculated 1-octanol/water partition coefficient (XLogP) [5,6], hydrogen bond donors (HBD) [6], hydrogen bond acceptors (HBA) [6], rotatable bonds (RotB) [7], topological polar surface area (tPSA) [7,8], an alternative calculated logP (ALOGPs) [9], calculated aqueous solubility (ALOGpS) [8], stereogenic centers (nStereo), *R* stereogenic centers (R), *S* stereogenic centers (S), nStereo/MW (nStMW), *R* – *S* (RSdelta), Rings, aromatic rings (RngAr), ring systems (RngSys), largest ring outline (RngLg), and Rings/RngSys (RRSys). These parameters were selected based on several criteria. First, Lipinski parameters [6] ( $MW \leq 500$ ,  $\log P \leq 5$ ,  $HBA \leq 10$ ,  $HBD \leq 5$ ) and Veber parameters [7] ( $RotB \leq 10$ ,  $tPSA \leq 140 \text{ \AA}^2$ ) have been correlated with oral bioavailability and are frequently used to filter drug-like libraries. Second, Tetko's calculated aqueous solubility (ALOGpS) [8] was included as compound solubility is critical in screening. Third, since we did not have a convenient means to assess three-dimensional descriptors, several stereochemical parameters (nStereo, R, S, RSdelta) were included as a

first-order approximation of three-dimensional complexity – the last three are pertinent only to libraries containing enantiomeric compounds as an arbitrary and imperfect indication of stereochemical diversity, but were retained from other analyses we have performed for consistency. A molecular weight-normalized value (nStMW) was also included as a measure of ‘stereochemical density’. Fourth, several additional parameters found by Feher and Schmidt to differentiate synthetic drugs and natural products were included [9]. Synthetic drugs tend to have more nitrogens, while natural products tend to have more oxygens (N,O). Natural products also tend to have fewer aromatic rings and more complex, fused ring systems (Rings, RngAr, RngSys, RngLg, RRSys). These data were assembled conveniently in a Microsoft Excel spreadsheet, and average values calculated for each compound series (**Table S3**).

**Table S1. Compounds used in principal component analysis.**

| Series                                               | Compounds                |                    |                    |                  |
|------------------------------------------------------|--------------------------|--------------------|--------------------|------------------|
| <b>Best-Selling Brand Name Drugs</b><br>(40 entries) | Lipitor                  | Lexapro            | Topamax            | Coreg            |
|                                                      | Nexium                   | Seroquel           | Toprol             | Valtrex          |
|                                                      | Prevacid                 | Protonix           | Zetia              | Adderall         |
|                                                      | Flonase                  | Ambien             | Fosamax            | Aciphex          |
|                                                      | Serevent                 | Actos              | Abilify            | Cymbalta         |
|                                                      | Singulair                | Zoloft             | Levaquin           | Crestor          |
|                                                      | Effexor                  | Wellbutrin         | Lamictal           | Diovan           |
|                                                      | Plavix                   | Avandia            | Celebrex           | Tricor           |
|                                                      | Zocor                    | Risperdal          | Benazepril         | Concerta         |
|                                                      | Norvasc                  | Zyprexa            | Zyrtec             | Imitrex          |
| <b>ChemBridge Library</b><br>(10 entries)            | <i>PubChem</i>           | 5771429            | 5309975            | 5308431          |
|                                                      | <i>Compound CIDs:</i>    | 5771374            | 5309772            | 5309246          |
|                                                      | 5771496                  | 5771371            | 5309762            | 5309020          |
| <b>ChemDiv Library</b><br>(10 entries)               | <i>PubChem</i>           | 2529482            | 2474145            | 2490046          |
|                                                      | <i>Compound CIDs:</i>    | 2474174            | 1340935            | 2490068          |
|                                                      | 2529498                  | 2471337            | 2490059            | 1342784          |
| <b>Nat Prods (compliant)</b><br>(12 entries)         | CephameycinC             | Mizoribine         | Coformycin         | Compactin        |
|                                                      | Spergualin               | SQ26180            | Arglabin           | Artemisinin      |
|                                                      | Forskolin                | Thienamycin        | Bestatin           | Plaunotol        |
| <b>Nat Prods (non-comp)</b><br>(12 entries)          | Daptomycin               | Validamycin        | MidecamycinA1      | Rapamycin        |
|                                                      | EchinocandinB            | Avermectin B1a     | Taxol              | FK506            |
|                                                      | Calicheamicin $\gamma$ 1 | Cyclosporin A      | Pseudomonic Acid A | Lipstatin        |
| <b>Natural Products (other)</b><br>(36 entries)      | Geldanamycin             | Trapoxin B         | Talaromycin B      | Bleomycin        |
|                                                      | Actinonin                | Vincristine        | Spongistatin 1     | Brefeldin A      |
|                                                      | Discodermolide           | Colchicine         | Radicicol          | Cytochalasin B   |
|                                                      | Monensin                 | Trichostatin       | Salicylhalamide A  | Epothilone A     |
|                                                      | Calyculin A              | Fumagillin         | Brevetoxin B       | Apoptolidin      |
|                                                      | Amphotericin B           | Staurosporine      | Rifamycin B        | Lactacystin      |
|                                                      | Adriamycin               | Erythromycin A     | Quinine            | Duocarmycin A    |
|                                                      | Ginkgolide B             | Streptomycin       | Mycobactin S       | Zaragozic Acid A |
|                                                      | Phorbol MA               | Penicillin G       | Telomestatin       | Vancomycin       |
| <b>COCB</b><br>(7 entries)                           | FR901464                 | Lactam Carboxamide | Pladienolide B     | Gemmacin         |
|                                                      | Robotnikinin             | Abyssoomicin C     | Avrainvillamide    |                  |

**Table S2. Structural and physicochemical parameters used in PCA.**

| Parameter      | Description                                         | Method of Determination                                                   |
|----------------|-----------------------------------------------------|---------------------------------------------------------------------------|
| <b>MW</b>      | molecular weight                                    | ChemDraw Analysis Window                                                  |
| <b>N</b>       | number of nitrogens                                 | ChemDraw Analysis Window                                                  |
| <b>O</b>       | number of oxygens                                   | ChemDraw Analysis Window                                                  |
| <b>XlogP</b>   | calc <i>n</i> -octanol/water partition coefficient  | <a href="http://www.vcclab.org">http://www.vcclab.org</a>                 |
| <b>HBD</b>     | number of hydrogen bond donors                      | <a href="http://www.molinspiration.com">http://www.molinspiration.com</a> |
| <b>HBA</b>     | number of hydrogen bond acceptors                   | <a href="http://www.molinspiration.com">http://www.molinspiration.com</a> |
| <b>RotB</b>    | number of rotatable bonds                           | <a href="http://www.molinspiration.com">http://www.molinspiration.com</a> |
| <b>tPSA</b>    | topological polar surface area                      | <a href="http://www.molinspiration.com">http://www.molinspiration.com</a> |
| <b>ALOGPs</b>  | calc <i>n</i> -octanol/water partition coeff (alt)  | <a href="http://www.vcclab.org">http://www.vcclab.org</a>                 |
| <b>ALOGpS</b>  | calculated aqueous solubility                       | <a href="http://www.vcclab.org">http://www.vcclab.org</a>                 |
| <b>nStereo</b> | number of stereocenters                             | <a href="http://www.molinspiration.com">http://www.molinspiration.com</a> |
| <b>R</b>       | number of R stereocenters                           | ChemDraw Show Stereochemistry                                             |
| <b>S</b>       | number of S stereocenters                           | ChemDraw Show Stereochemistry                                             |
| <b>RSdelta</b> | <i>R</i> – <i>S</i>                                 | Microsoft Excel                                                           |
| <b>nStMW</b>   | <i>nStereo</i> ÷ <i>MW</i> (stereochemical density) | Microsoft Excel                                                           |
| <b>Rings</b>   | number of rings                                     | Manual inspection                                                         |
| <b>RngAr</b>   | number of aromatic rings                            | Manual inspection                                                         |
| <b>RngSys</b>  | number of ring systems                              | Manual inspection                                                         |
| <b>RngLg</b>   | number of atoms in largest ring outline             | Manual inspection                                                         |
| <b>RRSys</b>   | <i>Rings</i> ÷ <i>RngSys</i> (ring complexity)      | Microsoft Excel                                                           |

**Table S3. Average structural and physicochemical parameters by compound series.**† = *nStMW* × 1000 for clarity

|                          | Drug | NP   | ChBr | ChDv | COCB |
|--------------------------|------|------|------|------|------|
| <b>MW</b>                | 361  | 629  | 381  | 446  | 488  |
| <b>N</b>                 | 2.2  | 2.6  | 4.3  | 4.7  | 2.0  |
| <b>O</b>                 | 2.9  | 9.7  | 3.1  | 3.4  | 5.6  |
| <b>XlogP</b>             | 2.7  | 1.5  | 2.9  | 1.8  | 3.3  |
| <b>HBD</b>               | 1.5  | 4.9  | 1.1  | 1.9  | 2.1  |
| <b>HBA</b>               | 5.4  | 10.8 | 5.9  | 7.7  | 6.7  |
| <b>RotB</b>              | 6.3  | 9.7  | 5.3  | 6.1  | 6.1  |
| <b>tPSA</b>              | 69   | 183  | 103  | 94   | 106  |
| <b>ALOGPs</b>            | 2.8  | 2.1  | 3.3  | 2.7  | 3.4  |
| <b>ALOGpS</b>            | -3.9 | -3.8 | -4.0 | -3.8 | -4.7 |
| <b>nStereo</b>           | 1.4  | 9.1  | 0.0  | 1.0  | 5.3  |
| <b>R</b>                 | 0.6  | 4.1  | 0.0  | 0.5  | 2.7  |
| <b>S</b>                 | 0.8  | 5.0  | 0.0  | 0.5  | 2.6  |
| <b>nStMW<sup>†</sup></b> | 3.7  | 13.9 | 0.0  | 1.3  | 11.2 |
| <b>RSdelta</b>           | -0.2 | -0.9 | 0.0  | 0.0  | 0.1  |
| <b>Rings</b>             | 2.9  | 3.8  | 3.2  | 4.2  | 4.7  |
| <b>RngAr</b>             | 2.1  | 1.0  | 2.9  | 2.9  | 1.1  |
| <b>RngSys</b>            | 2.1  | 2.0  | 3.1  | 3.1  | 2.4  |
| <b>RngLg</b>             | 8.4  | 15.8 | 6.3  | 9.4  | 12.6 |
| <b>RRSys</b>             | 1.4  | 2.3  | 1.0  | 1.4  | 2.7  |

To provide a visual representation of the position of each compound in chemical space, we then carried out principal component analysis with the “R” open source statistical computing package[10] to reduce the 20-dimensional vector corresponding to each compound to a 2-dimensional vector, with minimal loss of information. The detailed protocol is as follows:

- 1) In MS Excel, a “Raw” worksheet was created with compounds in rows and physicochemical descriptors in columns. Note that compound names must not have spaces or other punctuation.
- 2) Average values were calculated for individual compound categories (*e.g.*, for “Drugs”, “Natural Products”, etc.) as well as MAX and MIN values for each column.
- 3) A “Norm” worksheet was created and normalized values were generated by normalizing each column to a range of 0–1 using the equation:

$$\text{normval} = (\text{val} - \text{MIN}) / (\text{MAX} - \text{MIN})$$

- 4) With the upper left cell blank (R requires this to recognize a header row), the Number format was designated for all data columns to 4 decimal places.
- 5) The Excel workbook was saved.
- 6) The “Norm” worksheet was saved as “Data.txt” (Text–Tab Delimited) on the Desktop (Mac).
- 7) The Excel workbook was closed and the changes discarded.
- 8) The “R” open source computing package was opened and the following commands were entered:
 

|                                             |                                       |
|---------------------------------------------|---------------------------------------|
| 9) R> read.table(“~/Desktop/Data.txt”) -> a | { read data into dataframe a          |
| 10) R> t(a) -> b                            | { transposed dataframe a to b         |
| 11) R> prcomp(b) -> c                       | { PCA of dataframe b results to c     |
| 12) R> summary(c)                           | { summary of %contributions           |
|                                             | { copied to a text file for reference |
| 13) R> biplot(c,ylabs = NULL)               | { plot of data and eigenvectors       |
|                                             | { saved as a screenshot for reference |
- 14) R> c
- 15) This final command gave a line listing of the results. The first section of the data was selected and copied (PC1–PC6, without top headers).
- 16) These results were pasted into a MS Word text file and the font changed to Courier 8 pt.
- 17) This MS Word file was Saved as... “Results.txt” (Text Only with Line Breaks)
- 18) Excel was opened again and the results were imported by selecting Get External Data... in the Data menu, then Import from Text file.
- 19) The “Fixed” width button was left checked and dividers were adjusted, making sure to include minus signs in the second column (PC1) rather than the first (compound names).
- 20) This data file was imported into a new Excel worksheet “Results”.
- 21) The first three columns (compound names, PC1, PC2) were copied into a new worksheet “PCA”, and the Number format was designated to 3 decimal places.
- 22) Each group of compounds was then sorted in order of ascending PC1 to facilitate its location on the PCA plot.
- 23) With the PC1 and PC2 columns selected, the Scatter XY plot was selected in the Chart Wizard.
- 24) Series information for each set of compounds, *e.g.* Drugs, AVG Drug, etc., was entered and the chart formatted as desired.
- 25) Subsequent revisions to the dataset could then be made easily by using Paste Special... Values from new Results worksheets onto the existing PCA worksheet.

Compounds and compound family averages were plotted on the two newly generated axes (principal components), which were unitless, orthogonal, and are based on linear combinations of the original 20 variables. The Summary information from R above indicated that the first principle component (PC1), or eigenvector, represented 56.1% of the variance in the original

dataset, and PC2 represented an additional 16.6%, for a total of 72.7% (**Table S4**). The Biplot information from R above illustrated the component loadings, with MW and tPSA shifting compounds to the left, XlogP and AlogPs shifting compounds to the right, RngAr shifting compounds to the top, and nStMW shifting compounds to the bottom (**Figure S1**).

**Table S4. Summary results from R indicating standard deviation and percent contribution for each principal component.**

|                               | PC1   | PC2   | PC3   | PC4   | PC5   | PC6   | PC7   | PC8   | PC9   | PC10  |
|-------------------------------|-------|-------|-------|-------|-------|-------|-------|-------|-------|-------|
| <b>Standard deviation</b>     | 1.963 | 1.068 | 0.774 | 0.693 | 0.478 | 0.427 | 0.374 | 0.263 | 0.218 | 0.196 |
| <b>Proportion of Variance</b> | 0.561 | 0.166 | 0.087 | 0.070 | 0.033 | 0.027 | 0.020 | 0.010 | 0.007 | 0.006 |
| <b>Cumulative Proportion</b>  | 0.561 | 0.727 | 0.814 | 0.884 | 0.918 | 0.944 | 0.964 | 0.975 | 0.981 | 0.987 |

**Figure S1. Plot of component loadings from R PCA.**

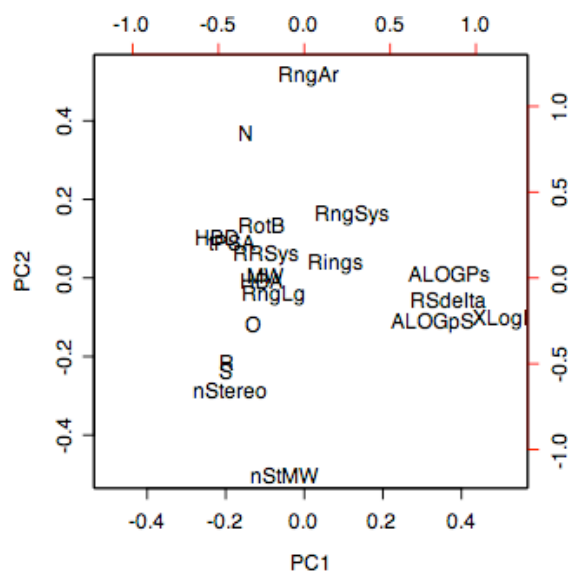

## B. PubChem substructure search protocol and results

Substructure searches for scaffolds found in the PubChem database were carried out using the substructure search function at <http://pubchem.ncbi.nlm.nih.gov/>. (Select “Chemical structure search”, followed by the “Substructure/Superstructure” tab). SMILES codes were entered for each scaffold to be searched and the results restricted to compounds in the MLSMR (*Filters: Data source: From = MLSMR*).

**Figure S2. Results of PubChem substructure searches for core scaffolds of library-derived probes.**

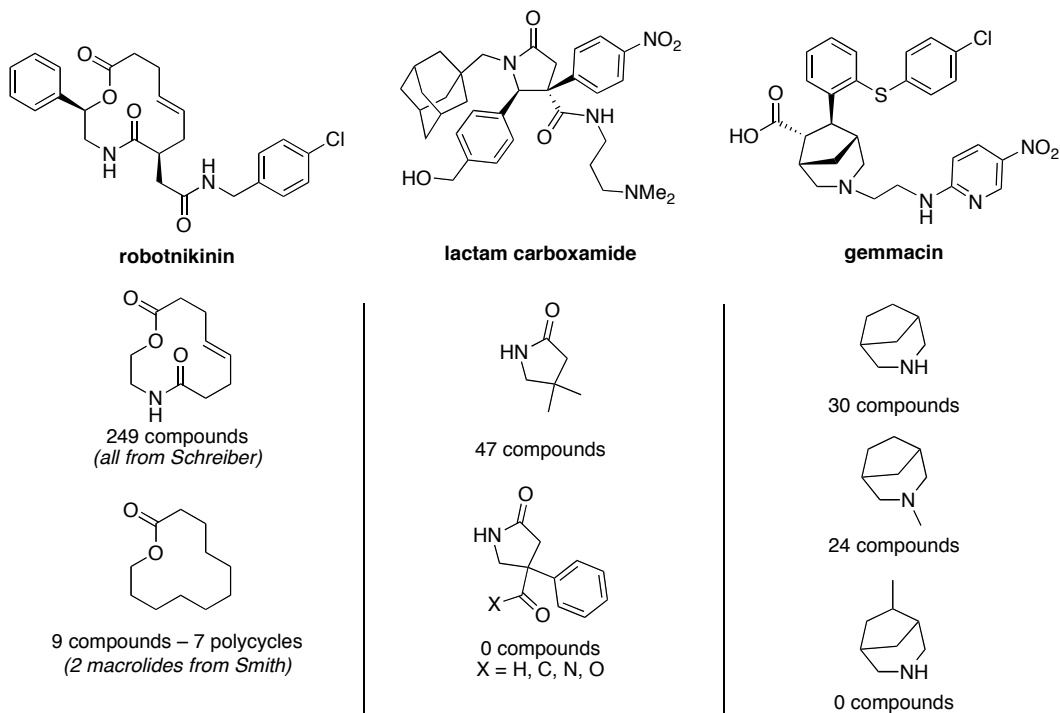

### **C. Supplementary references**

1. Top 200 Brand-Name Drugs by Retail Dollars in 2006; <http://drugtopics.modernmedicine.com/>
2. Ganesan: **The impact of natural products upon modern drug discovery.** *Curr Opin Chem Biol* 2008, **12**:306–317.
3. MolInspiration – free on-line cheminformatics tool; <http://www.molinspiration.com/cgi-bin/properties>
4. Tetko, I. V., Virtual Computational Chemistry Laboratory; <http://www.vcclab.org/lab/alogps/>
5. Tetko IV, Tanchuk VY, Kasheva TN, Villa AEP: **Internet software for the calculation of the lipophilicity and aqueous solubility of chemical compounds.** *J Chem Inf Comput Sci* 2001, **41**:246–252.
6. Lipinski CA, Lombardo F, Dominy BW, Feeney PJ: **Experimental and computational approaches to estimate solubility and permeability in drug discovery and development settings.** *Adv Drug Deliv Rev* 1997, **23**:3–25.
7. Veber DF, Johnson SR, Cheng H-Y, Smith BR, Ward KW, Kopple KD: **Molecular properties that influence the oral bioavailability of drug candidates.** *J Med Chem* 2002, **45**:2615–2623.
8. Tetko IV, Tanchuk VY, Kasheva TN, Villa AEP: **Estimation of aqueous solubility of chemical compounds using E-state indices.** *J Chem Inf Comput Sci* 2001, **41**:1488–1493.
9. Feher M, Schmidt JM: **Property distributions: Differences between drugs, natural products, and molecules from combinatorial chemistry.** *J Chem Inf Comput Sci* 2003, **43**:218–227.
10. The R Project for Statistical Computing; <http://www.r-project.org/>
